# Supplementary material for: Microbial electrosynthesis: carbonaceous electrode materials for CO2 conversion
Source: Royal Society of Chemistry journal article supplement (doi:10.1039/d2mh01178f), 2022-12-02
Supplement: d2mh01178f1.pdf [file d2mh01178f1.pdf]

## Microbial Electrosynthesis: Carbonaceous Electrode Materials for CO<sub>2</sub> Conversion

### Supporting Information

**Table S1.** A Comparison on the key features of various technologies for CO<sub>2</sub> conversion

| <b>CO<sub>2</sub> conversion methods</b> | Thermocatalysis                                                                                                                    | Photoelectrochemical                                                                                                                               | Photocatalysis                                                                                                    | Electrocatalysis                                                                                            | MES                                                                                                                                                                                                |
|------------------------------------------|------------------------------------------------------------------------------------------------------------------------------------|----------------------------------------------------------------------------------------------------------------------------------------------------|-------------------------------------------------------------------------------------------------------------------|-------------------------------------------------------------------------------------------------------------|----------------------------------------------------------------------------------------------------------------------------------------------------------------------------------------------------|
| <b>Main products</b>                     | MeOH, CH <sub>4</sub> , C <sub>2+</sub> products                                                                                   | Formate, HCHO, HCOOH, CH <sub>4</sub> , CH <sub>3</sub> OH, CH <sub>3</sub> CH <sub>2</sub> OH                                                     | MeOH, CH <sub>4</sub>                                                                                             | C <sub>2+</sub> products                                                                                    | Organic acids, alcohols, fatty acids, lipids, etc.                                                                                                                                                 |
| <b>Advantages</b>                        | <p>Large output of products.</p> <p>Tandem routes for value-added products.</p> <p>Appropriate to use at the industrial level.</p> | <p>Product selectivity can be controlled.</p> <p>The utilization of renewable solar energy.</p> <p>Operating at room temperature and pressure.</p> | <p>Simple reactor designs.</p> <p>Utilization of sunlight.</p> <p>Operating at room temperature and pressure.</p> | <p>An effective method of storing electrical energy.</p> <p>Operating at room temperature and pressure.</p> | <p>Unaffected by system fluctuations.</p> <p>Higher conversion efficiency.</p> <p>Capable of self-healing.</p> <p>Operating at room temperature and pressure.</p> <p>Good product selectivity.</p> |

|                          |                                                                                                                                                                                                |                                                             |                                                                              |                                                                                                                                                                                                                             |                                                                                                                                                                                                                                                                                        |
|--------------------------|------------------------------------------------------------------------------------------------------------------------------------------------------------------------------------------------|-------------------------------------------------------------|------------------------------------------------------------------------------|-----------------------------------------------------------------------------------------------------------------------------------------------------------------------------------------------------------------------------|----------------------------------------------------------------------------------------------------------------------------------------------------------------------------------------------------------------------------------------------------------------------------------------|
| <p><b>Challenges</b></p> | <p>The consumption of excessive energy.</p> <p>Poor product selectivity.</p> <p>The chances of coke formation are higher.</p> <p>High temperature and/or pressure operations are required.</p> | <p>Lack of stability.</p> <p>Low yield and selectivity.</p> | <p>Low energy efficiency.</p> <p>Poor product selectivity and stability.</p> | <p>Requires high overpotential.</p> <p>More complex reaction pathways.</p> <p>The liquid electrolyte has a low CO<sub>2</sub> solubility, which reduces the current density.</p> <p>Poor yield and product selectivity.</p> | <p>Requires high overpotential for long-chain products.</p> <p>Rising costs are experienced because of the high energy required to activate the bacterial pathway for autotrophic development</p> <p>Needs a particular growing medium.</p> <p>Membrane biofouling is susceptible.</p> |
|--------------------------|------------------------------------------------------------------------------------------------------------------------------------------------------------------------------------------------|-------------------------------------------------------------|------------------------------------------------------------------------------|-----------------------------------------------------------------------------------------------------------------------------------------------------------------------------------------------------------------------------|----------------------------------------------------------------------------------------------------------------------------------------------------------------------------------------------------------------------------------------------------------------------------------------|

**Table S2.** The key findings of the state-of-the-art of carbonaceous electrodes for MES-based CO<sub>2</sub> conversion.

| Electrode Material                                                                    | Surface area                          | Microbe/Medium                            | Biofilm thickness | Faradaic /Coulombic Efficiency (%) | Current Density                                               | Over potential required for the product yield | Product Yield                                                                                                                            | Reference                             |
|---------------------------------------------------------------------------------------|---------------------------------------|-------------------------------------------|-------------------|------------------------------------|---------------------------------------------------------------|-----------------------------------------------|------------------------------------------------------------------------------------------------------------------------------------------|---------------------------------------|
| CNT-MXene                                                                             | 8.66 m <sup>2</sup> g <sup>-1</sup>   | Mixed microbial consortium                | —                 | 7                                  | - 324 mA m <sup>-2</sup>                                      | -800 mV (vs. Ag/AgCl)                         | Butyrate (780 mg/L)                                                                                                                      | Tahil et al., 2022 <sup>1</sup>       |
| Graphene-CNTs                                                                         | 344.17 m <sup>2</sup> g <sup>-1</sup> | <i>Clostridium ljungdahlii</i> (DSM13528) | —                 | 83 ± 11                            | 595 ± 77 mA m <sup>-2</sup>                                   | -600 mV vs. SHE                               | Acetate (278 ± 44 mM m <sup>-2</sup> d <sup>-1</sup> )                                                                                   | Han et al., 2019 <sup>2</sup>         |
| CF/rGO-Magnetite                                                                      | 0.824 cm <sup>2</sup>                 | <i>Rhodopseudomonas palustris</i> TIE-1   | —                 | 9.05 ± 0.2                         | -11.7 ± 0.1 μA cm <sup>-2</sup>                               | -1.212 V vs. SHE                              | Polyhydroxybutyrate (91.31 ± 0.9 mg l <sup>-1</sup> )                                                                                    | Rengasamy et al., 2020 <sup>3</sup>   |
| Graphite and Carbon cloth                                                             | 49.5 cm <sup>2</sup>                  | <i>Sporomusa ovata</i>                    | —                 | 80                                 | -20 A m <sup>-2</sup>                                         | -0.9 V vs Ag/AgCl                             | Acetate (~11 g/L)                                                                                                                        | Bajracharya et al., 2022 <sup>4</sup> |
| Co-Pi/GF                                                                              |                                       | <i>Rhodobacter sphaeroides</i> 2.4.1      | —                 | 58.3                               | —                                                             | -1.0 to +1.0 V (vs. Ag/AgCl)                  | Malate (1.7 ± 0.2 mg L <sup>-1</sup> )<br>Succinate (5.7 ± 0.1 mg L <sup>-1</sup> )<br>Total carotenoids (1.7 ± 0.1 mg L <sup>-1</sup> ) | Fitriana et al., 2022 <sup>5</sup>    |
| Activated carbon fiber-supported g-C <sub>3</sub> N <sub>4</sub> -NiCoWO <sub>4</sub> | 65 m <sup>2</sup> /g                  | <i>Escherichia coli</i>                   | —                 | 56.6                               | 640 mA/m <sup>2</sup> (light)<br>316 mA/m <sup>2</sup> (dark) | -1.0 V vs AgCl                                | Formate (12.8 mM)                                                                                                                        | Gupta and Verma, 2022 <sup>6</sup>    |
| N-doped Fe <sub>3</sub> O <sub>4</sub> @CDs                                           | —                                     | <i>Geobacter sulfurreducens</i>           |                   | 30                                 | ~8 mA                                                         | -1.0 V vs AgCl                                | Methane (222.52 mL)                                                                                                                      | Cheng et al., 2022 <sup>7</sup>       |
| Carbon fibers                                                                         | —                                     | <i>Methanobacterium</i>                   | —                 | 68.5 ± 4.8                         | —                                                             | -1.0 V vs. Ag/AgCl                            | Methane (298.0 ± 46.7 mL L <sup>-1</sup> d <sup>-1</sup> )                                                                               | Zhang et al., 2022 <sup>8</sup>       |
| Carbon brush                                                                          | —                                     | <i>Methanothrix</i>                       | —                 | 18.8 %                             | ~4.07 × 10 <sup>-4</sup> A/m <sup>2</sup>                     | -0.5 V vs. SHE                                | Methane (5.2 mmol day <sup>-1</sup> )                                                                                                    | Liu et al., 2020 <sup>9</sup>         |

|                            |                                      |                                                                                       |          |           |                         |                    |                                                                |                                        |
|----------------------------|--------------------------------------|---------------------------------------------------------------------------------------|----------|-----------|-------------------------|--------------------|----------------------------------------------------------------|----------------------------------------|
| RVC                        | —                                    | Mixed microbial consortium                                                            | 5 ± 2 µm | ~100      | -37 A m <sup>-2</sup>   | -0.85 V (vs SHE)   | Acetate (1330 g m <sup>-2</sup> day <sup>-1</sup> )            | Flexer and Jourdin, 2020 <sup>10</sup> |
| MXene coated Biochar       | 64.05 m <sup>2</sup> g <sup>-1</sup> | <i>Firmicutes</i> (66 %), <i>Proteobacteria</i> (13%), and <i>Bacteroidetes</i> (12%) | —        | 12        | -239.4 m <sup>-2</sup>  | -800 mv (vs AgCl)  | Butyrate (~1000 mg L <sup>-1</sup> )                           | Tahir et al., 2021 <sup>11</sup>       |
| Carbon paper               | —                                    | Enriched anaerobic sludge                                                             | —        | 74.15 ± 5 | 14.26 A m <sup>-2</sup> | -0.85 V vs SHE     | Acetic acid (197.50 ± 10 g m <sup>-2</sup> day <sup>-1</sup> ) | Answer et al., 2021 <sup>12</sup>      |
| 3D bioprinted Carbon cloth | —                                    | <i>Sporomusa ovata</i>                                                                | ~1 mm    | 62.7±15.4 | 14.8 A m <sup>-2</sup>  | -800 mV vs Ag/AgCl | Acetate (104 g day <sup>-1</sup> m <sup>-2</sup> )             | Krige et al., 2021 <sup>13</sup>       |

**References** (\*these reference numbers are different from the main manuscript):

1. K. Tahir, N. Maile, A. A. Ghani, B. Kim, J. Jang and D. S. Lee, *Bioelectrochemistry*, 2022, **146**, 108140.
2. S. Han, H. Liu, C. Zhou and H.-j. Ying, *Journal of Materials Chemistry A*, 2019, **7**, 1115-1123.
3. K. Rengasamy, T. Ranaivoarisoa, W. Bai and A. Bose, *Nanotechnology*, 2020, **32**, 035103.
4. S. Bajracharya, A. Krige, L. Matsakas, U. Rova and P. Christakopoulos, *Chemosphere*, 2022, **287**, 132188.
5. H. N. Fitriana, S. Lee, H. S. Kim, J. Lee, Y. Lee, J.-S. Lee, H. Park, C. H. Ko, S. Y. Lim and S. Y. Lee, *Bioelectrochemistry*, 2022, **145**, 108102.
6. P. Gupta and N. Verma, *Chemical Engineering Journal*, 2022, **446**, 137029.
7. J. Cheng, R. Xia, H. Li, Z. Chen, X. Zhou, X. Ren, H. Dong, R. Lin and J. Zhou, *ACS Sustainable Chemistry & Engineering*, 2022, **10**, 3935-3950.
8. Z. Zhang, X. Lu, C. Niu, T. Cai, N. Wang, Y. Han, R. Zhang, Y. Song and G. Zhen, *Fuel*, 2022, **310**, 122450.
9. C. Liu, X. Yuan, Y. Gu, H. Chen, D. Sun, P. Li, M. Li, Y. Dang, J. A. Smith and D. E. Holmes, *ACS Sustainable Chemistry & Engineering*, 2020, **8**, 11368-11375.
10. V. Flexer and L. Jourdin, *Accounts of Chemical Research*, 2020, **53**, 311-321.
11. K. Tahir, W. Miran, J. Jang, N. Maile, A. Shahzad, M. Moztahida, A. A. Ghani, B. Kim, H. Jeon and D. S. Lee, *Science of The Total Environment*, 2021, **773**, 145677.
12. A. H. Anwer, N. Khan, M. D. Khan, S. Shakeel and M. Z. Khan, *Fuel*, 2021, **302**, 121124.
13. A. Krige, U. Rova and P. Christakopoulos, *Journal of Environmental Chemical Engineering*, 2021, **9**, 106189.

**Table S3.** Comparison of advantages and disadvantages of various carbonaceous electrode materials

| <b>Cathode Material</b>                 | <b>Advantages</b>                                                                                                                                                              | <b>Disadvantages</b>                                                                    |
|-----------------------------------------|--------------------------------------------------------------------------------------------------------------------------------------------------------------------------------|-----------------------------------------------------------------------------------------|
| Carbon nanotubes                        | High specific surface area, excellent mesopore density, and large current-carrying capacity.                                                                                   | Inadequate catalytic activity                                                           |
| Graphene                                | Promotes bacterial proliferation, large surface area, great electrical conductivity, high carrier mobility, exceptional intrinsic mechanical strength, and chemical stability. | Fragility in oxidative conditions                                                       |
| Graphene oxide                          | Promotes the development of a thick electroactive biofilm.                                                                                                                     | Less electrical conductivity, the more the chances of agglomeration.                    |
| Reduced Graphene oxide                  | Enables highly efficient bidirectional electron transfers among both bacteria and electrodes, cheaper, and good surface area.                                                  | Less conductivity than graphene, poor water affinity, and dispersibility.               |
| Graphite                                | Affordable, porous conductive material, good biofilm adherence, preferential electroactive bacterium attachment, conductive.                                                   | Low oxidation rate, lower power density, strong contact resistance, and hydrophobicity. |
| Graphite felt                           | Good biofilm growth, surface area, porous nature, encourage direct electron transfer, cost-effective, reasonably high overpotentials.                                          | Challenges with polarisation                                                            |
| <i>g</i> -C <sub>3</sub> N <sub>4</sub> | Superior chemical stability, relative affordability, and intriguing electronic band structure.                                                                                 | Minimal surface area and less charge carrier movement.                                  |
| Activated carbon                        | Significant surface area for microbial colonisation,                                                                                                                           | Can result in clogs, and Combustion danger                                              |

|                                  |                                                                                                                                                                        |                                                          |
|----------------------------------|------------------------------------------------------------------------------------------------------------------------------------------------------------------------|----------------------------------------------------------|
|                                  | cheap, high surface area, is readily available in market, is simple to process, has high porosity, and is extremely scalable                                           |                                                          |
| Carbon felt                      | Sufficient contact area and volume for microbial colonization, transportation of microbes, and increased electroactivity.                                              | Reduced catalytic efficiency and anode conductivity.     |
| Carbon dots                      | Development of promising nano-bio interfaces by conjugation with biomolecules, great photostability, compact diameters, strong biocompatibility, and minimal toxicity. | Agglomeration.                                           |
| Carbon fibers                    | Fibrous structure, high porosity, quick adsorption kinetics, and porous storage capacity.                                                                              | Expensive, and complicated synthesis procedures.         |
| Carbon brush                     | Porous surface area, low resistance, and good electrical conductivity. The dense morphology can prevent the biofouling of electrode materials.                         | Increased interface resistance and poor current density. |
| Reticulated vitreous carbon foam | Highly porous morphology, excellent conductivity, and large surface area promote mass dispersion and microbial development, low price, and simple handling.            | Poor product yield and selectivity                       |
| MXenes                           | Exceptional conductivity, ion intercalation behaviour, and hydrophilicity.                                                                                             | Not enough ecological resilience.                        |
| Biochar                          | High porosity, low cost for physical activation,                                                                                                                       | Chemical activation is expensive                         |

|  |                   |  |
|--|-------------------|--|
|  | and renewability. |  |
|--|-------------------|--|
